# Supplementary material for: IL-7 Induces an Epitope Masking ofγc Protein in IL-7 Receptor Signaling Complex
Source: Hindawi journal article supplement (doi:10.1155/2017/9096829), 2017-01-01
Supplement: f1 [file 9096829.f1.pdf]

## Supplemental figure 1

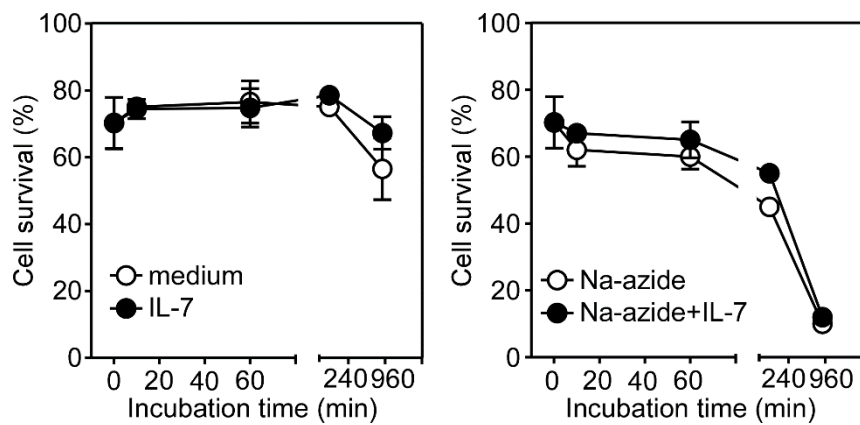

Survival kinetics of WT LN T cells in presence or absent of IL-7 with or without Na-azide. Cell survival was determined by gating on propidium iodide negative cells. Data are summary of three independent experiments (mean and SEM).
